# Supplementary material for: Soil Acidobacterial 16S rRNA Gene Sequences Reveal Subgroup Level Differences between Savanna-Like Cerrado and Atlantic Forest Brazilian Biomes
Source: Hindawi journal article supplement (doi:10.1155/2014/156341), 2014-01-01
Supplement: f1 [file 156341.f1.pdf]

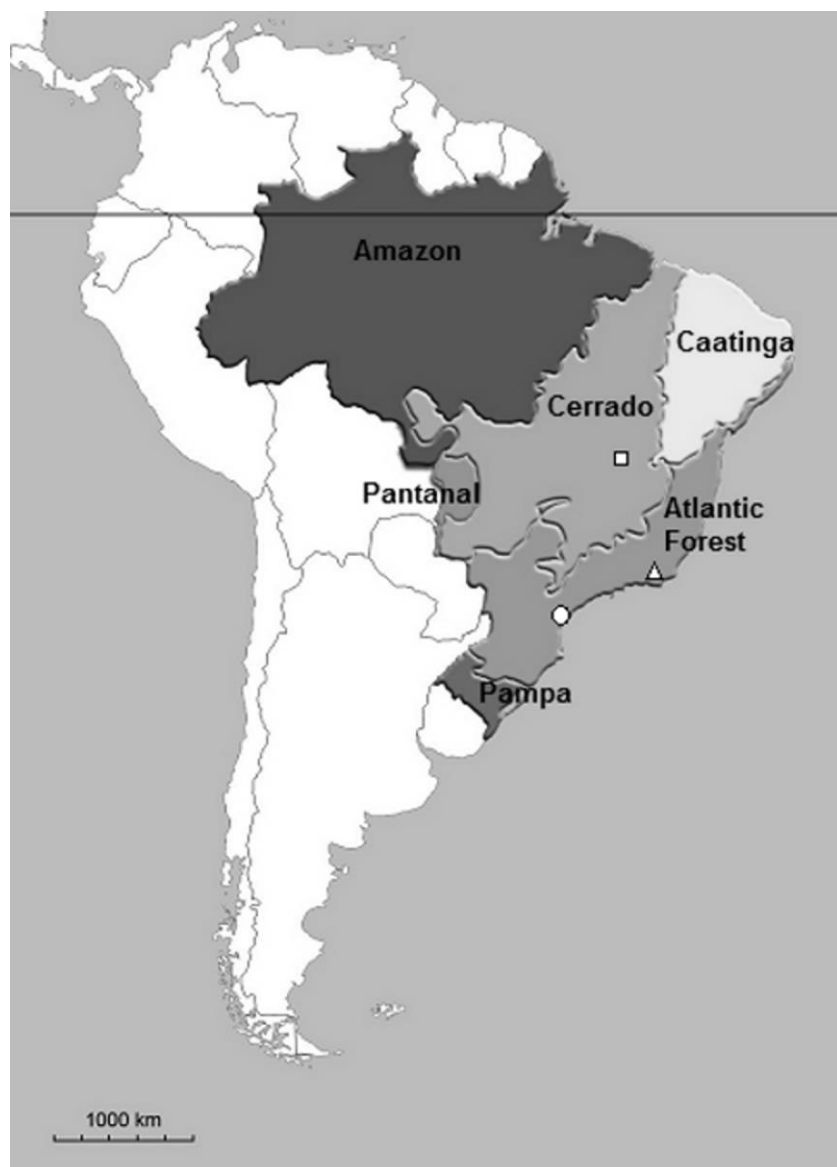

| Area sampled             | Subarea | Similarity cutoff | Nseqs <sup>1</sup> | Sobs <sup>2</sup> | Chao  | Ace   | Shannon | Simpson |
|--------------------------|---------|-------------------|--------------------|-------------------|-------|-------|---------|---------|
| SA<br>(Savanna)          | CD      | 97%               | 93                 | 43                | 142.2 | 283.9 | 3.235   | 0.055   |
|                          | CS      | 97%               | 107                | 36                | 71.0  | 96.0  | 2.900   | 0.093   |
|                          | MG      | 97%               | 109                | 59                | 149.3 | 386.3 | 3.570   | 0.051   |
|                          | SS      | 97%               | 123                | 56                | 213.7 | 371.9 | 3.318   | 0.068   |
| SM<br>(Serra do Mar)     | MA01    | 97%               | 29                 | 24                | 52.5  | 69.6  | 3.128   | 0.012   |
|                          | MA02    | 97%               | 43                 | 41                | 288.0 | 440.8 | 3.697   | 0.002   |
|                          | MA03    | 97%               | 45                 | 32                | 60.9  | 63.1  | 3.371   | 0.016   |
|                          | MA04    | 97%               | 38                 | 35                | 159.0 | 221.7 | 3.528   | 0.004   |
|                          | MA05    | 97%               | 47                 | 35                | 143.8 | 490.1 | 3.362   | 0.026   |
|                          | MA06    | 97%               | 52                 | 35                | 60.3  | 70.3  | 3.430   | 0.019   |
|                          | MA07    | 97%               | 48                 | 34                | 99.0  | 103.3 | 3.382   | 0.020   |
|                          | MA08    | 97%               | 41                 | 27                | 44.0  | 48.1  | 3.181   | 0.023   |
|                          | MA09    | 97%               | 52                 | 35                | 93.5  | 276.6 | 3.328   | 0.032   |
|                          | MA10    | 97%               | 48                 | 33                | 52.1  | 58.7  | 3.398   | 0.017   |
| SO<br>(Serra dos Órgãos) | S1      | 97%               | 57                 | 39                | 84.1  | 295.7 | 3.444   | 0.029   |
|                          | S2      | 97%               | 67                 | 41                | 118.5 | 299.5 | 3.434   | 0.031   |
|                          | S3      | 97%               | 77                 | 46                | 112.0 | 110.0 | 3.495   | 0.040   |
|                          | S4      | 97%               | 66                 | 48                | 165.2 | 165.3 | 3.729   | 0.014   |
|                          | S5      | 97%               | 43                 | 33                | 63.7  | 74.7  | 3.427   | 0.012   |
|                          | S6      | 97%               | 93                 | 64                | 170.9 | 179.3 | 3.934   | 0.019   |

<sup>1</sup> Number of sequences;

<sup>2</sup> Sequences observed

Savanna (SA) - 'Cerrado denso' (CD), 'campo sujo' (CS), 'mata de galeria'(MG), 'Cerrado *sensu stricto*' (SS)

'Serra dos Órgãos' (SO) - sites 1 to 6 (S1, S2, S3, S4, S5, S6)

'Serra do Mar' (SM) - MA01, MA02, MA03, MA04, MA05, MA06, MA07, MA08, MA09, MA10

| <b>Subgroups</b>   | <b>SAV</b> | <b>SM</b>  | <b>SO</b>  | <b>SAV-SO</b> | <b>SAV-SM</b> | <b>SM-SO</b> | <b>SAV-SM-SO</b> |
|--------------------|------------|------------|------------|---------------|---------------|--------------|------------------|
| Gp1                | 29         | 36         | 46         | 4             | 6             | 6            | 20               |
| Gp2                | 18         | 46         | 57         | 5             | 5             | 9            | 3                |
| Gp3                | 24         | 19         | 28         | 2             | 4             | 4            | 2                |
| Gp4                | 1          | 1          | 2          |               |               |              |                  |
| Gp5                | 1          | 5          | 2          |               |               | 2            | 1                |
| Gp6                | 5          | 13         | 4          |               |               | 2            |                  |
| Gp7                |            | 1          | 5          | 1             |               |              |                  |
| Gp13               | 1          | 5          | 4          |               |               |              |                  |
| Gp15               |            | 2          |            |               |               |              |                  |
| Gp17               | 1          |            |            | 1             |               |              |                  |
| <b>OTUs Total*</b> | <b>80</b>  | <b>128</b> | <b>148</b> | <b>13</b>     | <b>15</b>     | <b>23</b>    | <b>26</b>        |

\* 97% Similarity cutoff

Savanna (SA); 'Serra do Mar' (SM); 'Serra dos Órgãos' (SO)

| <b>Subgroups</b>       | <b>SAV</b> | <b>SM</b>  | <b>SO</b>  | <b>SAV-SO</b> | <b>SAV-SM</b> | <b>SM-SO</b> | <b>SAV-SM-SO</b> |
|------------------------|------------|------------|------------|---------------|---------------|--------------|------------------|
| Gp1                    | 98         | 60         | 57         | 19            | 20            | 20           | 397              |
| Gp2                    | 24         | 86         | 85         | 17            | 17            | 52           | 58               |
| Gp3                    | 35         | 30         | 32         | 10            | 30            | 22           | 11               |
| Gp4                    | 1          | 1          | 3          |               |               |              |                  |
| Gp5                    | 1          | 7          | 2          |               |               | 16           | 7                |
| Gp6                    | 7          | 16         | 4          |               |               | 9            |                  |
| Gp7                    |            | 1          | 5          | 2             |               |              |                  |
| Gp13                   | 1          | 6          | 4          |               |               |              |                  |
| Gp15                   |            | 2          |            |               |               |              |                  |
| Gp17                   | 1          |            |            | 2             |               |              |                  |
| <b>Number of reads</b> | <b>168</b> | <b>209</b> | <b>192</b> | <b>50</b>     | <b>67</b>     | <b>119</b>   | <b>473</b>       |

Savanna (SA); 'Serra do Mar' (SM); 'Serra dos Órgãos' (SO)
